# Supplementary material for: Preparation of chiral glycerol derivatives using chemoenzymatic approaches
Source: Royal Society of Chemistry journal article supplement (doi:10.1039/c4ra04515g), 2014-08-01

## Supplementary data

(Copies of spectra)

### Preparation of chiral glycerol derivatives using chemoenzymatic approaches

Carmen Solarte,<sup>a</sup> Mercè Balcells,<sup>a</sup> Mercè Torres,<sup>b</sup> Núria Sala,<sup>b</sup> Ramon Canela-Garayoa,<sup>\*a</sup>

<sup>a</sup> Department of Chemistry, University of Lleida-Agrotecnio Center, Rovira Roure 191, Lleida, 25198, Spain.

<sup>b</sup> Department of Food Science and Technology, University of Lleida, Rovira Roure 191, Lleida, 25198, Spain.

\* Corresponding author. E-mail addresses: canela@quimica.udl.cat (R. Canela); Tel.: +34 973 702843; Fax: +34 973238264.

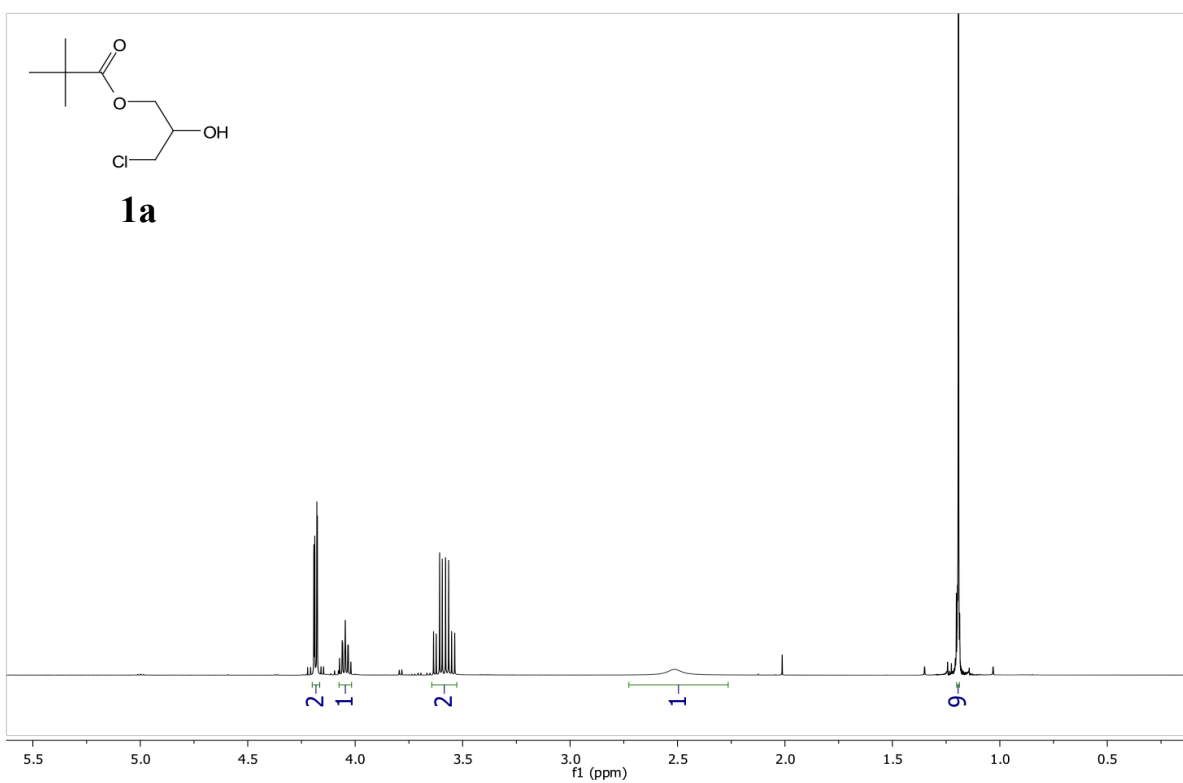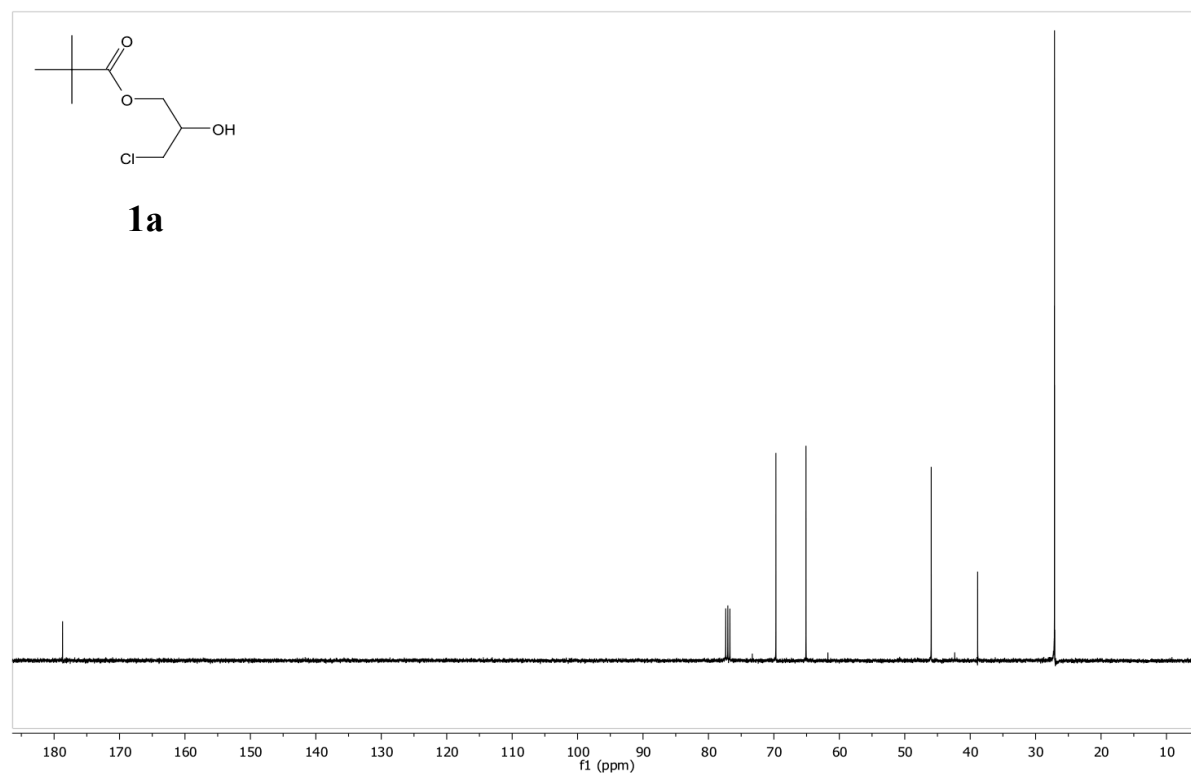

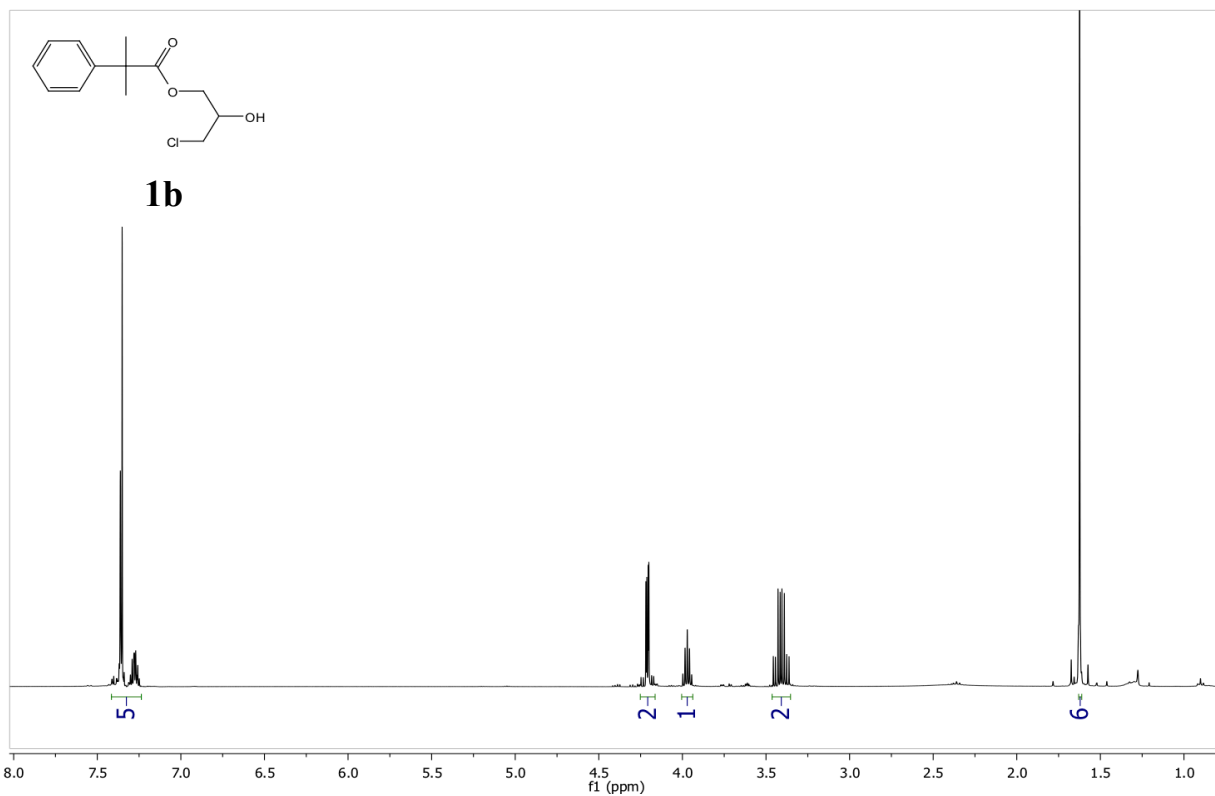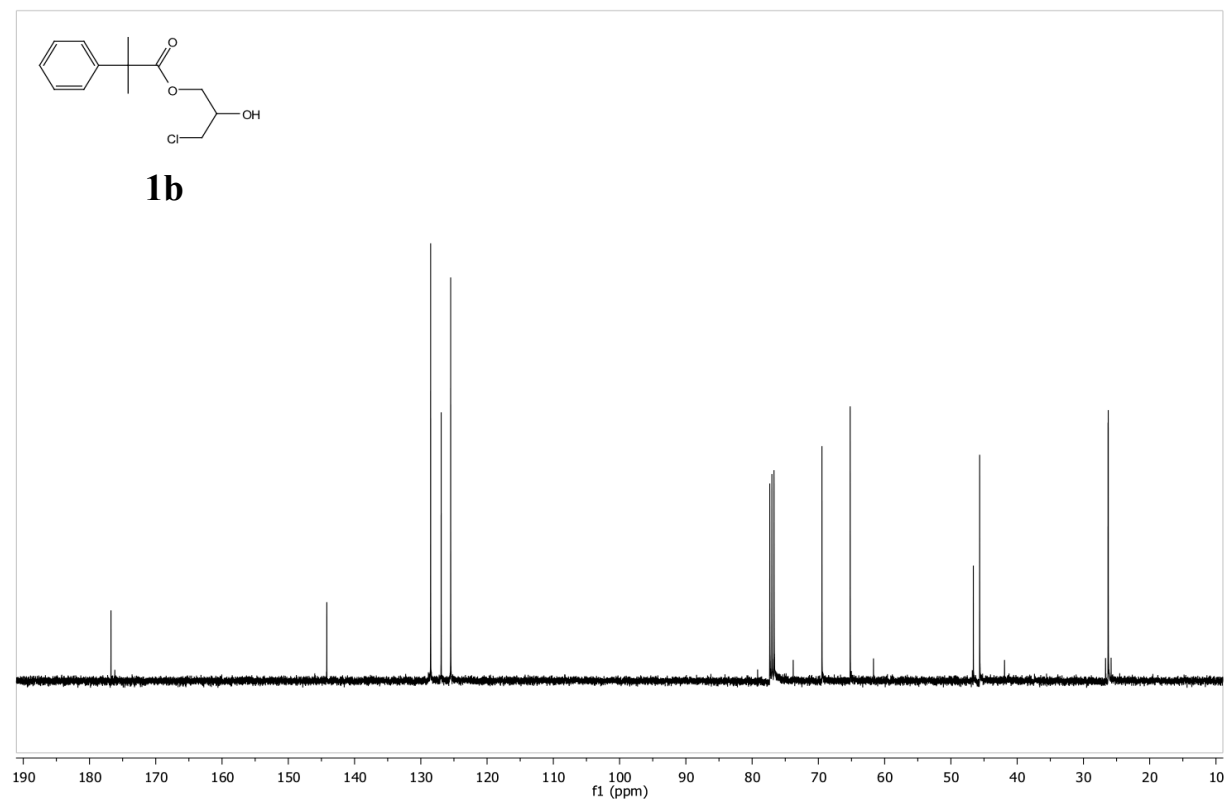

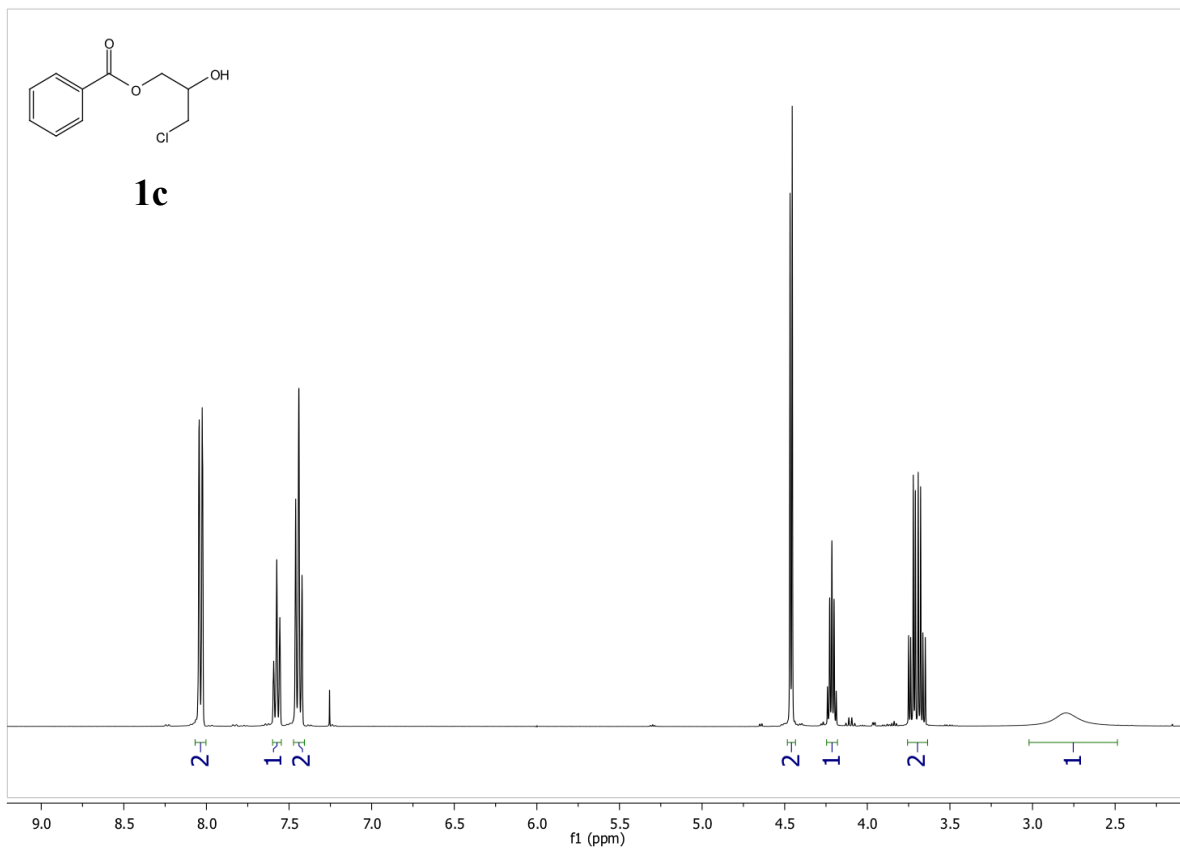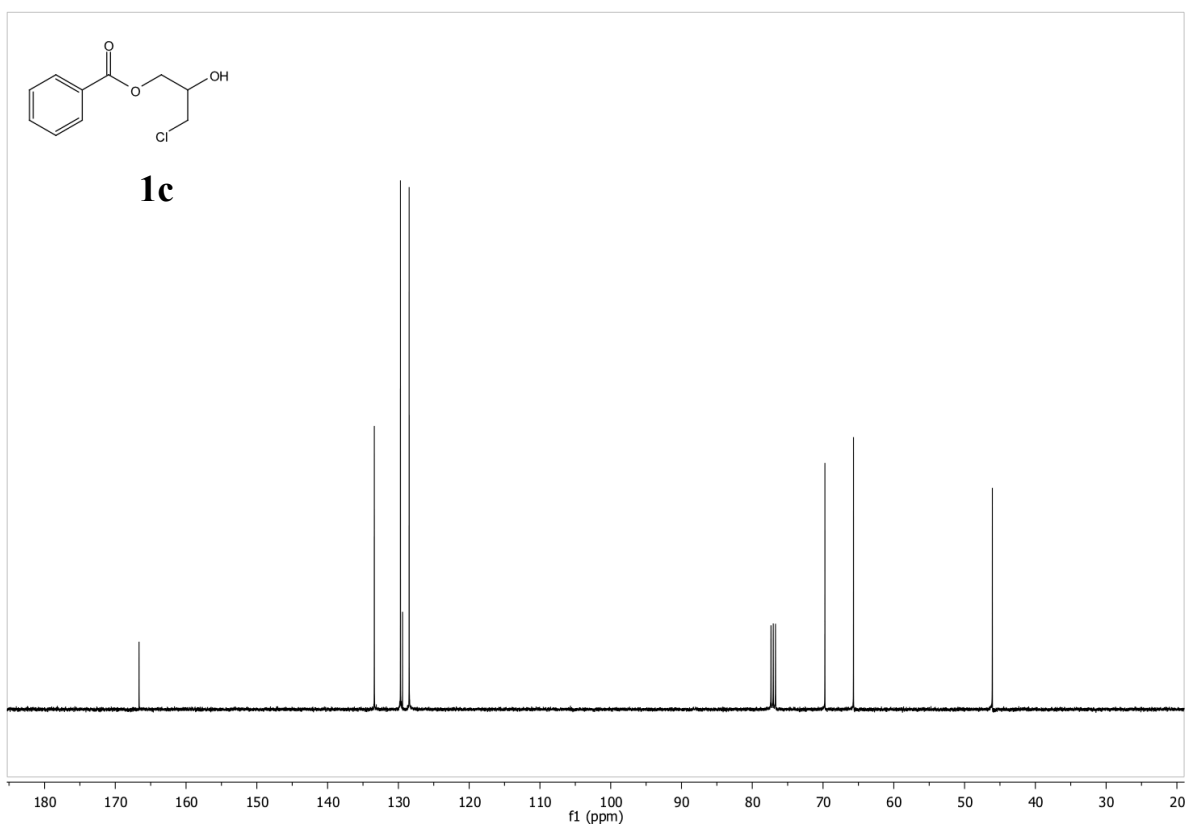

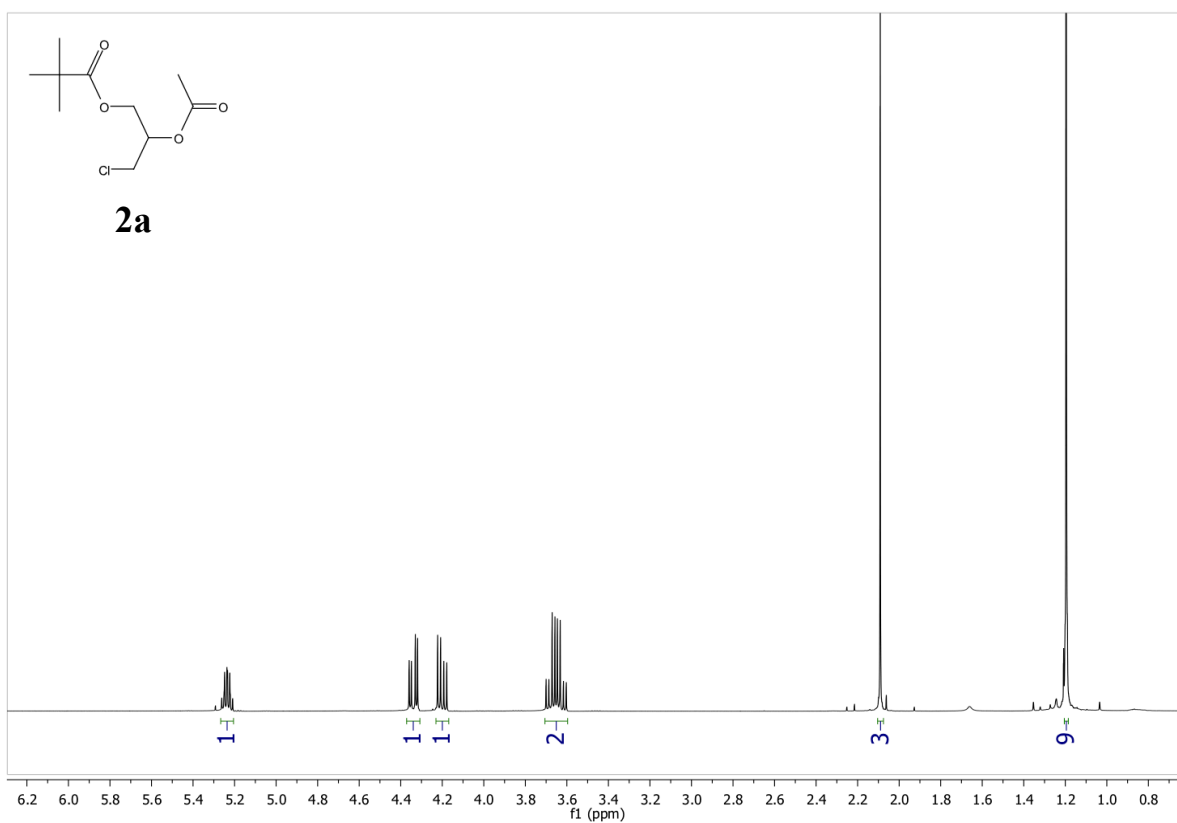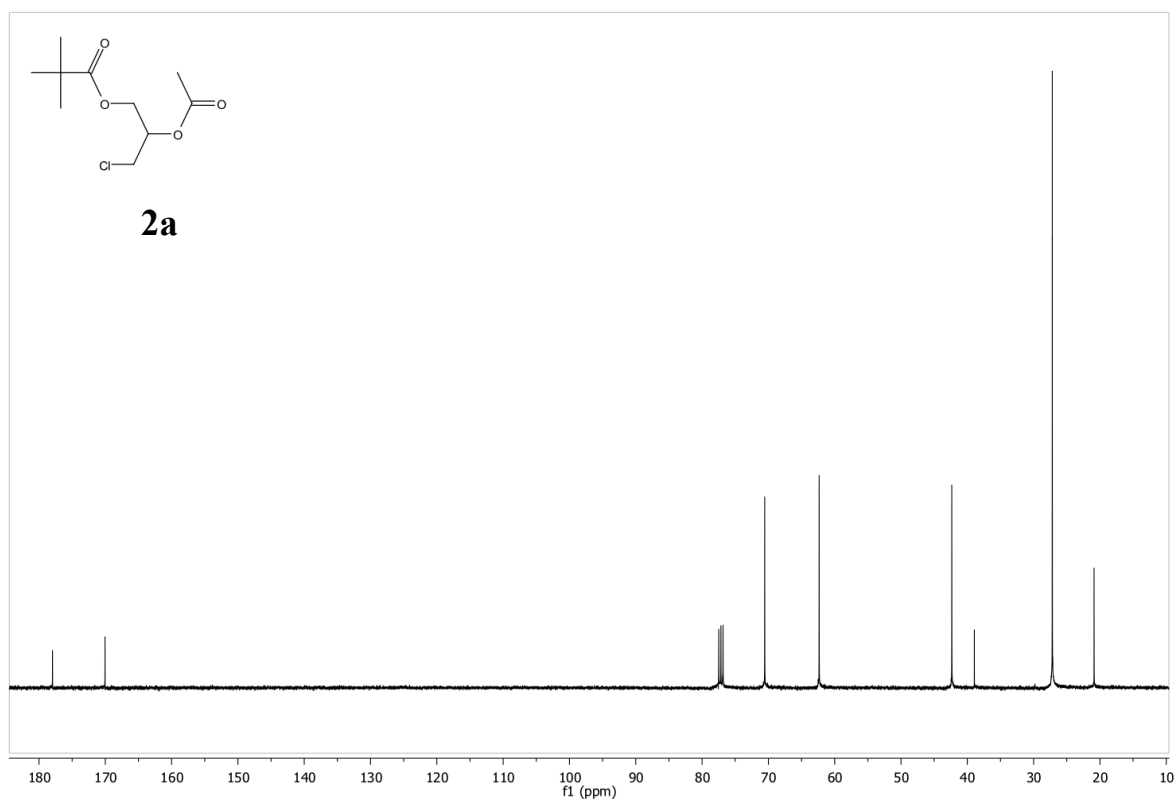

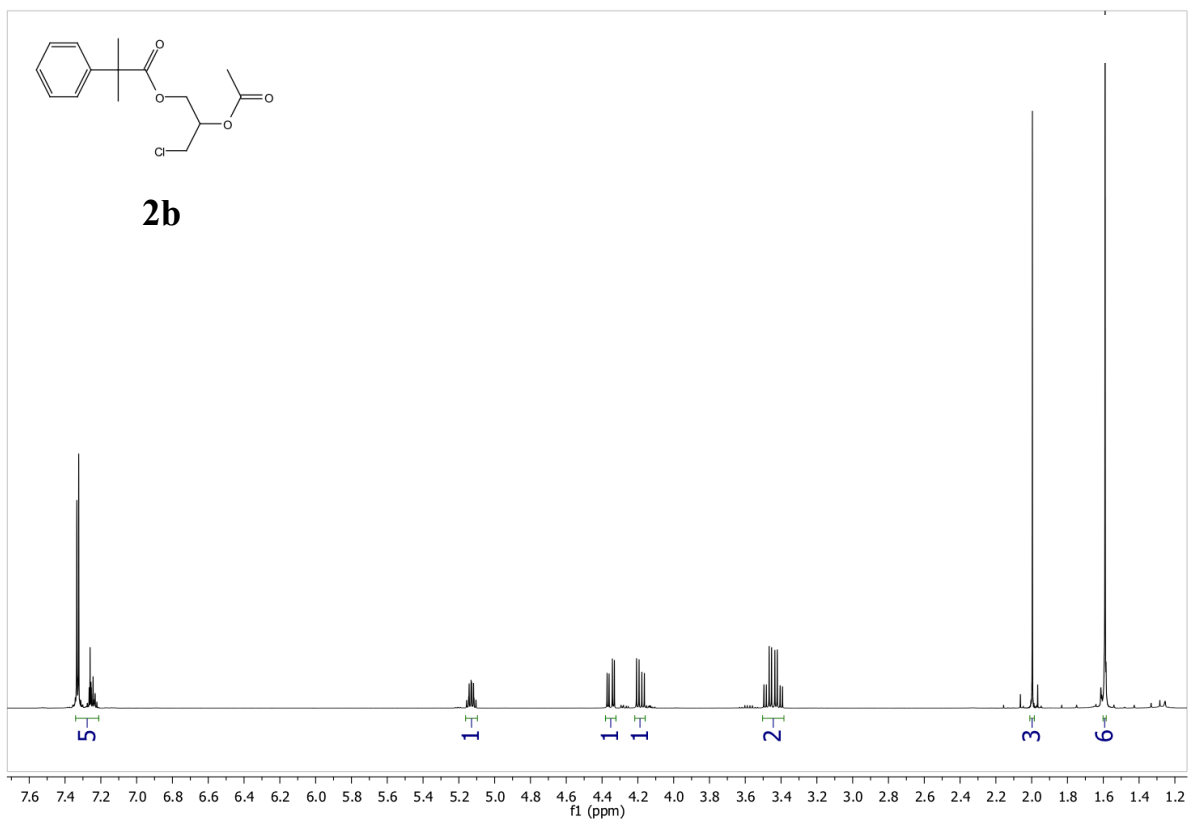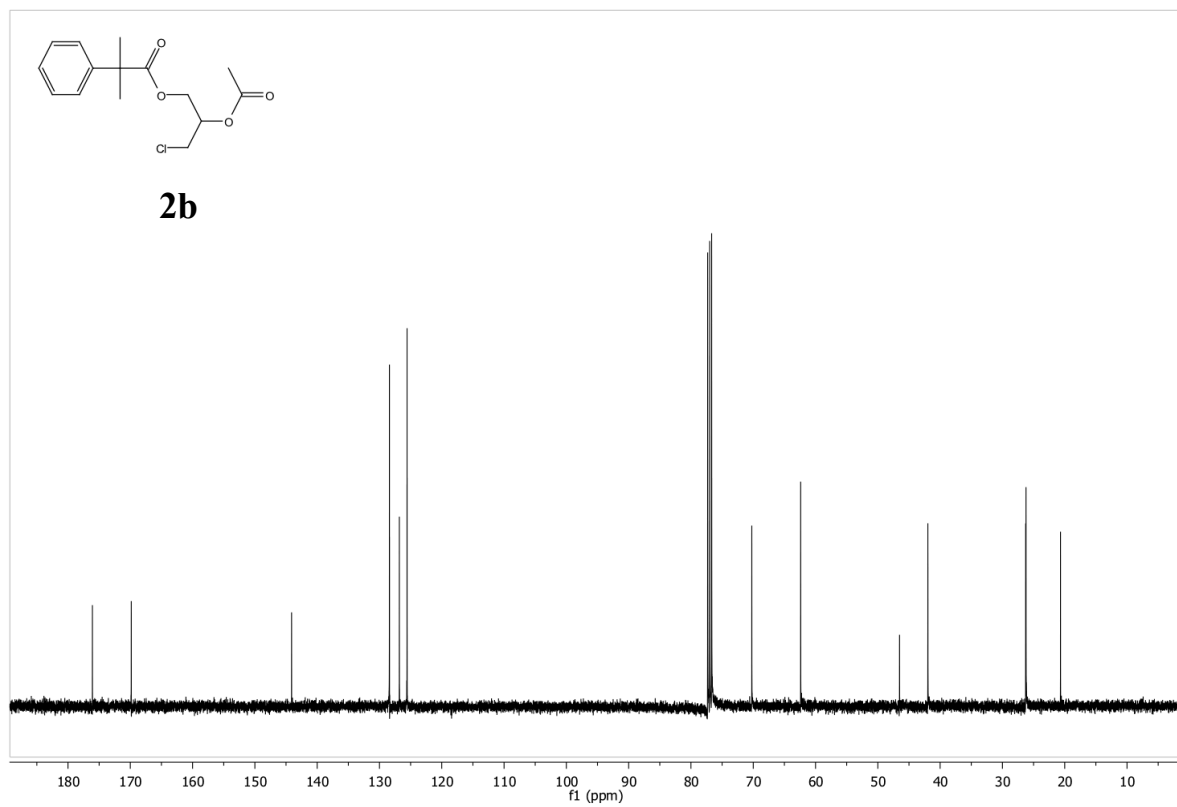

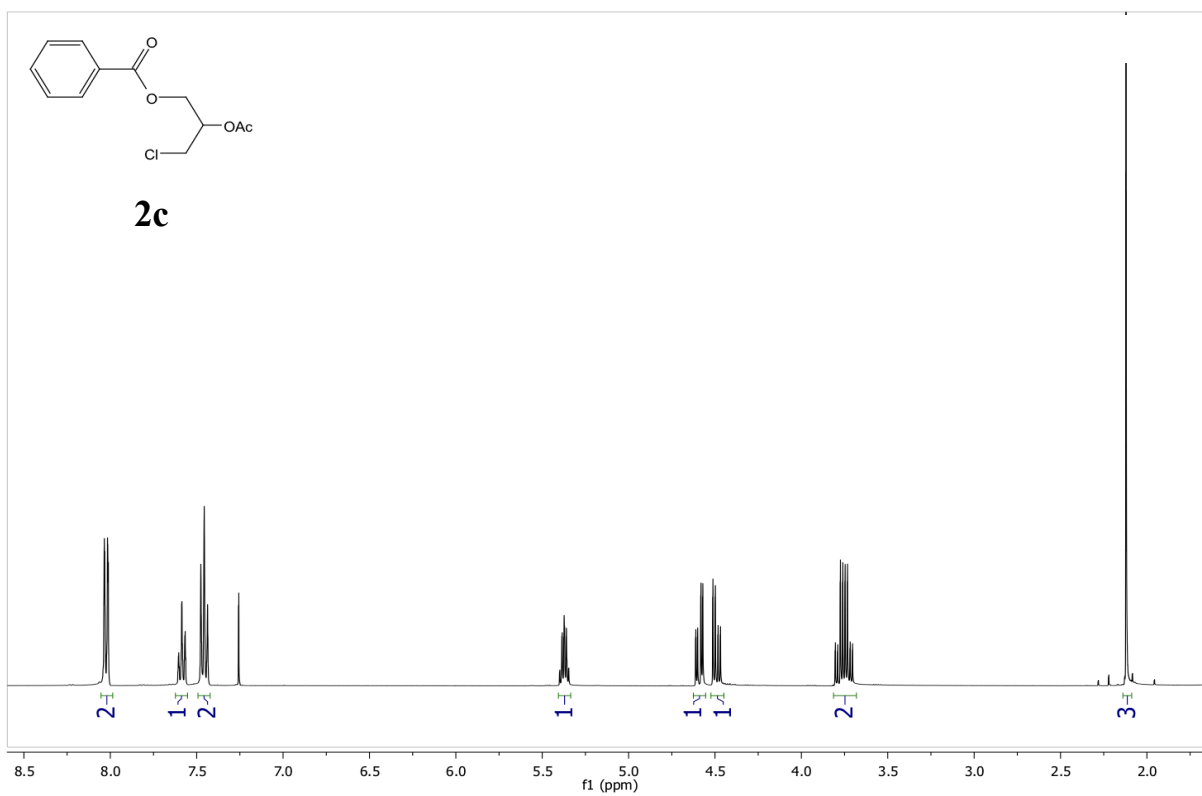

Supplement: c4ra04515g1.pdf [file c4ra04515g1.pdf]
